# Supplementary material for: Green Synthesis of Endolichenic Fungi Functionalized Silver Nanoparticles: The Role in Antimicrobial, Anti-Cancer, and Mosquitocidal Activities
Source: MDPI journal article supplement (doi:10.3390/ijms231810626), 2022-09-13
Supplement: s1 [file s1]

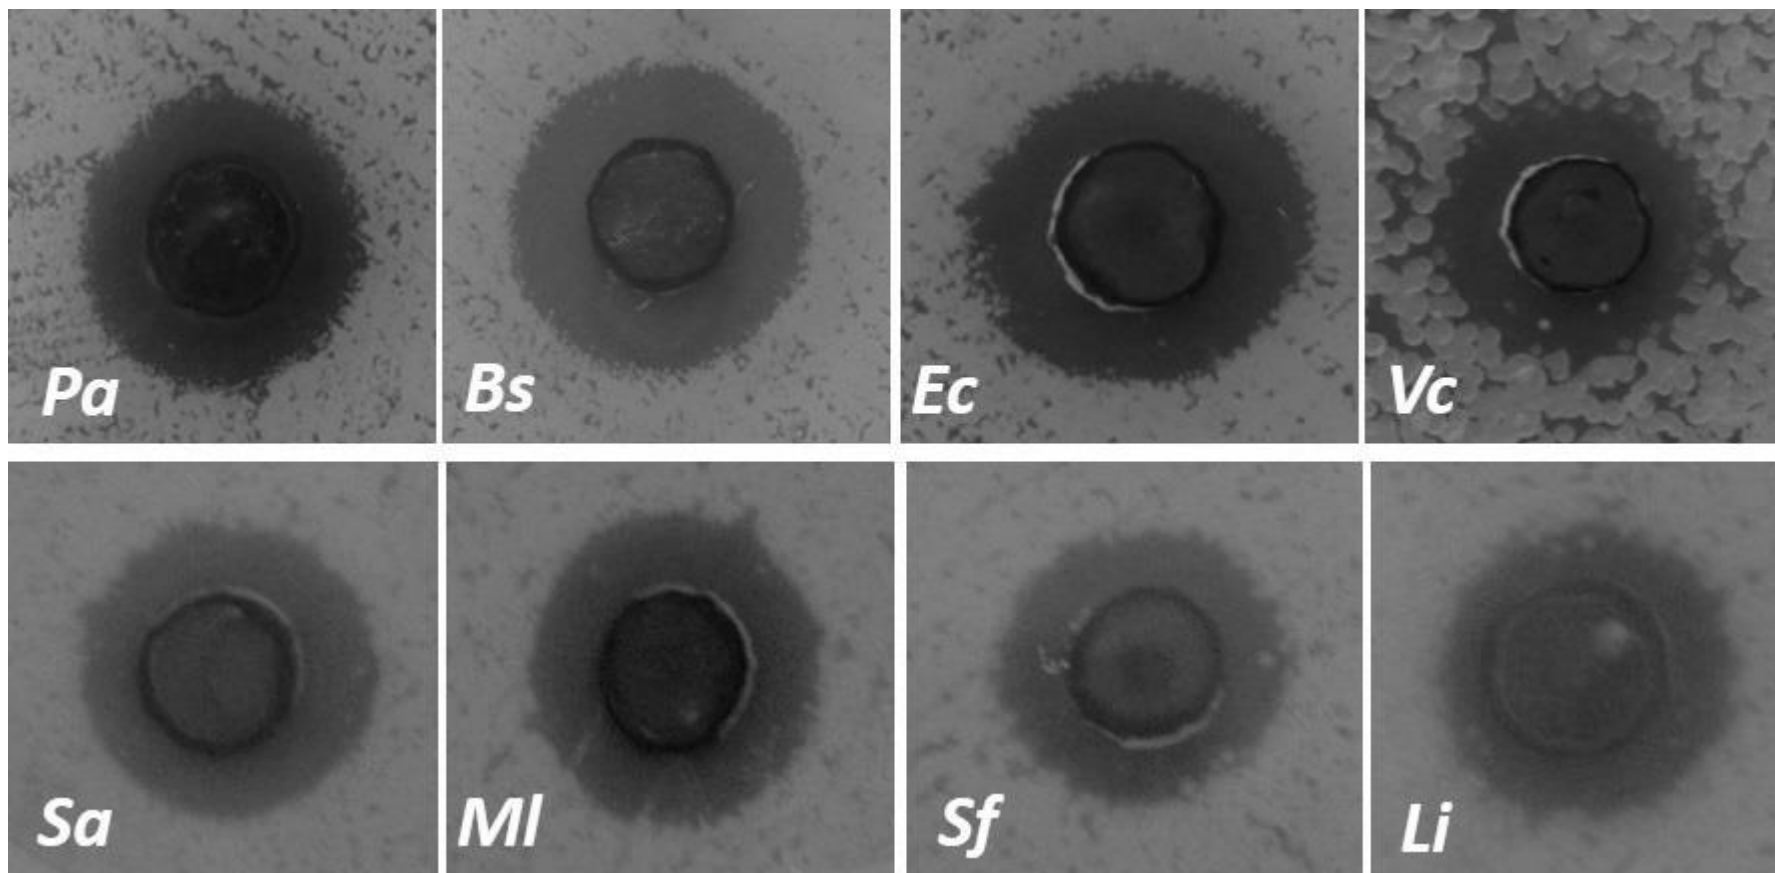

**Supplementary Figure S1:** Antimicrobial activity (ZI) of *T. funiculosus* –AgNPs by agar well diffusion method: ***Pa***: *Pseudomonas aeruginosa*; ***Bs***: *Bacillus subtilis*; ***Ec***: *Escherichia coli*; ***Vc***: *Vibrio cholera*; ***Sa***: *Staphylococcus aureus*; ***MI***: *Micrococcus luteus*; ***Sf***: *Streptococcus faecalis*; ***Li***: *Listeria innocua*.

Supplementary Table-S1:

| Test Microorganisms           | % of inhibition $\pm$ S.D. ( $\mu\text{g/mL}$ ) |                     |                     |                     |                     |                     |                     |                     |                     |                     |                      | MIC IC <sub>50</sub> ( $\mu\text{g/mL}$ ) |
|-------------------------------|-------------------------------------------------|---------------------|---------------------|---------------------|---------------------|---------------------|---------------------|---------------------|---------------------|---------------------|----------------------|-------------------------------------------|
|                               | 0 $\mu\text{g/mL}$                              | 10 $\mu\text{g/mL}$ | 20 $\mu\text{g/mL}$ | 30 $\mu\text{g/mL}$ | 40 $\mu\text{g/mL}$ | 50 $\mu\text{g/mL}$ | 60 $\mu\text{g/mL}$ | 70 $\mu\text{g/mL}$ | 80 $\mu\text{g/mL}$ | 90 $\mu\text{g/mL}$ | 100 $\mu\text{g/mL}$ |                                           |
| <i>Staphylococcus aureus</i>  | 0.00                                            | 0.00                | 2.27 $\pm$ 0.12     | 31.07 $\pm$ 0.74    | 40.67 $\pm$ 0.45    | 50.77 $\pm$ 0.63    | 81.00 $\pm$ 1.41    | 99.00 $\pm$ 0.62    | 99.57 $\pm$ 1.23    | 99.07 $\pm$ 0.74    | 100.00 $\pm$ 0.82    | 43.94 $\pm$ 0.29                          |
| <i>Listeria innocua</i>       | 0.00                                            | 0.00                | 13.93 $\pm$ 1.41    | 23.53 $\pm$ 0.68    | 28.20 $\pm$ 0.67    | 35.17 $\pm$ 0.94    | 43.07 $\pm$ 1.38    | 50.40 $\pm$ 0.43    | 62.13 $\pm$ 0.87    | 91.33 $\pm$ 1.43    | 99.80 $\pm$ 1.07     | 68.94 $\pm$ 0.30                          |
| <i>Micrococcus luteus</i>     | 0.00                                            | 12.80 $\pm$ 1.53    | 23.17 $\pm$ 0.70    | 30.57 $\pm$ 0.49    | 41.47 $\pm$ 0.46    | 52.23 $\pm$ 0.90    | 72.40 $\pm$ 1.35    | 83.53 $\pm$ 1.20    | 99.37 $\pm$ 0.34    | 99.93 $\pm$ 0.17    | 99.97 $\pm$ 0.86     | 45.51 $\pm$ 0.21                          |
| <i>Streptococcus faecalis</i> | 0.00                                            | 0.00                | 0.00                | 21.90 $\pm$ 1.42    | 35.27 $\pm$ 1.31    | 45.70 $\pm$ 0.29    | 63.17 $\pm$ 1.39    | 72.57 $\pm$ 1.77    | 90.63 $\pm$ 0.29    | 99.07 $\pm$ 0.74    | 100.00 $\pm$ 0.82    | 52.54 $\pm$ 0.16                          |
| <i>Vibrio cholerae</i>        | 0.00                                            | 0.00                | 2.73 $\pm$ 0.46     | 4.13 $\pm$ 0.17     | 7.73 $\pm$ 0.96     | 17.50 $\pm$ 1.80    | 41.67 $\pm$ 1.03    | 50.97 $\pm$ 0.76    | 81.70 $\pm$ 2.09    | 99.00 $\pm$ 0.62    | 99.57 $\pm$ 1.23     | 63.69 $\pm$ 0.25                          |
| <i>Escherichia coli</i>       | 0.00                                            | 3.40 $\pm$ 0.08     | 6.40 $\pm$ 0.16     | 15.50 $\pm$ 0.22    | 40.67 $\pm$ 0.45    | 50.77 $\pm$ 0.63    | 81.00 $\pm$ 1.41    | 99.00 $\pm$ 0.62    | 99.57 $\pm$ 1.23    | 100.00 $\pm$ 0.62   | 100.00 $\pm$ 0.71    | 43.94 $\pm$ 0.29                          |
| <i>Pseudomonas aeruginosa</i> | 0.00                                            | 20.27 $\pm$ 0.31    | 43.33 $\pm$ 2.21    | 50.77 $\pm$ 0.63    | 82.67 $\pm$ 1.70    | 99.00 $\pm$ 0.62    | 99.57 $\pm$ 1.23    | 100.00 $\pm$ 0.00   | 100.00 $\pm$ 0.00   | -                   | -                    | 21.68 $\pm$ 0.72                          |
| <i>Bacillus subtilis</i>      | 0.00                                            | 0.00                | 15.50 $\pm$ 0.22    | 41.13 $\pm$ 1.46    | 50.77 $\pm$ 0.63    | 81.17 $\pm$ 1.40    | 99.23 $\pm$ 0.86    | 100.00 $\pm$ 0.59   | -                   | -                   | -                    | 33.60 $\pm$ 0.61                          |
